# Supplementary material
Source: publisher figshare collection journal article supplement (https://geolsoc.figshare.com/ndownloader/files/9474841)
Supplement: Supplementary file 1 [file 9474841]

## Sheet: Table 2 - U-Pb
Table S2. Ion-microprobe zircon U-Pb data for the granites from Glenmacnass Waterfall
Grain No.	Sample /	Description	f206%	U	Th	Pb	Th/U	238U/	±σ	207Pb/	±σ	disc.	206Pb/	±σ	207Pb/	±σ
	Analysis No.			[µg/g]	[µg/g]	[µg/g]	meas.	206Pb	[%]	206Pb	[%]	2σ lim.	238U	[Ma]	206Pb	[Ma]
Foliated granite (13Gs11)
magmatic
5.11	n5081_13Gs11@3	sp, oz, r	0.07	1842.5	400.981	140.044	0.217629	14.6797	0.93967	0.0554741	0.523106		424.827	3.86444	431.38	5.82834
6.2	n5297_Gs11@5	sp, oz, CLd, r	{0.01}	1163.63	56.4961	84.7233	0.0485518	14.7044	0.792523	0.0551366	0.361561		424.137	3.25401	417.765	4.03802
5.8	n5081_13Gs11@2	ap, oz, CLb, c	0.09	1475.18	226.843	110.104	0.153773	14.719	0.939729	0.0548528	0.674809		423.729	3.85501	406.229	7.55166
6.4	n5297_Gs11@3	ap, oz, CLb, c	0.82	386.584	199.383	31.7172	0.515756	14.8567	0.96027	0.0550529	1.096		419.928	3.90509	414.371	12.2477
6.7	n5297_Gs11@8	sp, oz, c	3.99	1012.99	234.847	75.1509	0.231835	14.8581	1.3202	0.0546974	3.56852		419.888	5.36893	399.875	39.9791
6.9	n5297_Gs11@7	ap, oz, CLb, c	0.43	472.026	204.134	37.7833	0.432463	14.8668	0.815755	0.0548787	0.768302		419.652	3.31514	407.283	8.59633
6.8	n5297_Gs11@6	ap, oz, c	1.57	1383.59	401.729	106.296	0.290352	14.8776	0.890892	0.0549338	3.92034		419.356	3.6181	409.531	43.8464
5.9	n5081_13Gs11@6	ap, oz, c	{0.02}	864.02	278.958	66.8122	0.322861	14.9357	0.939459	0.0550817	0.665656		417.776	3.80148	415.54	7.43712
5.6	n5054_Gs11@1	sp, oz, CLb, c	{0.03}	409.794	88.0122	30.6361	0.214772	14.9548	0.820132	0.0551202	0.732327		417.26	3.31453	417.102	8.17977
5.5	n5054_Gs11@4	sp, oz, CLb, c	{0.00}	753.244	315.448	59.5123	0.418785	14.9573	1.05358	0.0543473	0.568088	0.271665	417.192	4.25765	385.468	6.38056
6.4	n5297_Gs11@2	ap, oz, CLb, c	0.06	503.924	247.393	40.6526	0.490932	14.9707	0.853401	0.0544839	0.594738		416.831	3.44559	391.104	6.67326
5.1	n5081_13Gs11@7	ap, oz, CLd, r	0.22	1154.19	277.5	86.2039	0.240428	14.9992	0.940416	0.0542155	0.79107		416.063	3.79024	380.011	8.89354
6.5	n5297_Gs11@1	ap, oz, CLb, c	{0.05}	630.376	174.262	47.9045	0.276442	15.0555	0.792612	0.0555309	0.543766		414.557	3.18319	433.662	6.05613
5.14	n5054_Gs11@8	ap, oz, CLb, c	0.77	1703.65	539.772	130.222	0.316833	15.0866	0.826986	0.0550414	0.686681		413.73	3.31486	413.904	7.67422
6.1	n5297_Gs11@10	sp, oz, c	{0.00}	559.688	205.13	43.1956	0.366508	15.1827	0.770097	0.0551046	0.660545		411.193	3.06843	416.472	7.37881
5.3	n5054_Gs11@2	sp, hoz, CLd, c	0.34	1237.85	490.926	95.1531	0.396596	15.2189	0.949411	0.0550675	0.642995		410.243	3.77466	414.965	7.18465
not used in age calculation
5.13	n5054_Gs11@6*	sp, oz, c	0.16	2676.33	335.944	208.837	0.125524	13.9381	1.14247	0.0545644	0.42409	7.33403	446.665	4.93212	394.419	4.75574
5.4	n5081_13Gs11@5*	sp, oz, c	0.15	5176.39	104.925	388.598	0.0202699	14.1163	0.947819	0.0549374	0.309418	3.39636	441.215	4.04329	409.677	3.46055
5.13	n5054_Gs11@7*	sp, oz, CLd, r	{0.00}	3436.14	78.3866	257.522	0.0228124	14.155	0.997926	0.0548414	0.244175	4.83498	440.05	4.24624	405.763	2.73274
5.10	n5054_Gs11@5†	sp, oz, CLb, c	0.24	380.583	123.458	28.4637	0.324393	15.4051	0.786319	0.0551298	2.06112		405.438	3.09059	417.492	23.0202
6.3	n5297_Gs11@4†	ap, oz, CLb, c	0.64	217.528	48.5332	14.8469	0.223112	16.4639	2.37307	0.0553355	1.67196		380.117	8.76558	425.802	18.6467
Equigranular granite (13Gs12)
inherited
5.5	n5068_13Gs12@06	sp, hoz, CLd, r	0.06	2238.51	62.8105	161.808	0.0280591	14.7123	0.690392	0.0550967	0.275162		423.917	2.83316	416.148	3.07395
6.17	n5289_Gs12@22	ap, oz, c	0.02	573.761	193.825	44.7254	0.337816	14.7362	0.936246	0.0548221	0.470765		423.249	3.83651	404.974	5.2694
5.9	n5068_13Gs12@09	sp, oz, CLd, r	0.17	1216.04	304.084	93.1016	0.250061	14.7639	0.691332	0.0549435	0.455914		422.482	2.82772	409.924	5.09875
6.3	n5289_Gs12@7	ap, oz, CLd, r	0.06	1629.19	601.836	128.941	0.369408	14.7881	0.79459	0.0547487	0.418773		421.813	3.2452	401.975	4.6899
6.11	n5289_Gs12@1	ap, oz, CLd, r	1.11	1548.72	363.428	117.184	0.234663	14.8605	0.995491	0.0546024	1.89663		419.824	4.0474	395.978	21.2629
6.19	n5289_Gs12@12	ap, oz, CLd, c	0.36	1636.86	680.192	129.683	0.415547	14.8825	0.81826	0.0552892	1.03816		419.222	3.32202	423.935	11.582
6.9	n5289_Gs12@6	ap, oz, CLb, ec	0.04	599.885	63.4142	43.6485	0.10571	14.9174	0.933946	0.0546093	0.675715		418.272	3.7835	396.262	7.57501
5.17	n5053_Gs12@4	sp, oz, CLb, c	{0.02}	670.835	230.191	52.0445	0.343141	14.9187	0.869431	0.0546295	0.601741		418.237	3.5218	397.09	6.74476
5.13	n5053_Gs12@2	sp, oz, CLb, c	1.25	855.921	403.962	67.9164	0.471962	14.9947	0.798353	0.0553851	1.68233		416.184	3.21844	427.804	18.7559
5.15	n5053_Gs12@3	bp, oz, CLb, r	{0.01}	684.242	216.629	52.4371	0.316597	14.9961	0.825908	0.0548504	0.59645		416.146	3.32926	406.129	6.67488
6.1	n5289_Gs12@15	bp, oz, CLb, c	0.01	431.308	72.5639	31.8446	0.168241	14.9963	0.897369	0.0553564	0.635632		416.142	3.61737	426.646	7.08793
magmatic
6.7	n5289_Gs12@3	ap, oz, CLd, r	0.4	1270.56	399.233	97.1053	0.314217	15.0751	0.765507	0.0543799	0.739366		414.035	3.07056	386.817	8.30232
6.15	n5289_Gs12@17	bp, oz, CLb, c	0.01	400.142	177.359	31.6475	0.443241	15.0796	0.8462	0.054683	0.689446		413.915	3.39336	399.286	7.72484
6.14	n5289_Gs12@2	bp, oz, CLb, c	{0.03}	201.783	50.897	15.1259	0.252236	15.1043	1.21112	0.0552178	1.2784		413.258	4.84981	421.051	14.2694
6.8	n5289_Gs12@5	sp,oz, CLb,c	0.12	563.696	100.286	41.3583	0.177908	15.1656	0.820315	0.0554872	0.751204		411.642	3.27204	431.906	8.369
6.5	n5289_Gs12@23	ap, oz, CLd, c	0.11	800.527	90.2901	57.4131	0.112788	15.2004	0.771762	0.0547683	0.664436		410.728	3.0717	402.775	7.44007
6.6	n5289_Gs12@4	bp, oz, CLb, r	0.04	554.232	94.3267	40.2309	0.170194	15.2735	0.779992	0.0552847	0.695418		408.823	3.09052	423.753	7.75851
6.13	n5289_Gs12@20	sp, hoz, CLd, c	0.84	1220.75	296.929	90.4194	0.243235	15.3193	0.784211	0.0557343	1.80719		407.639	3.09852	441.801	20.099
5.17	n5068_13Gs12@12	sp, oz, CLb, r	0.46	859.513	137.41	61.6282	0.159869	15.3247	0.707756	0.0546059	0.877689		407.5	2.79545	396.12	9.83946
5.15	n5068_13Gs12@02	bp, oz, CLb, c	0.29	398.298	183.204	31.3189	0.459968	15.3323	0.671003	0.0553409	0.863569		407.305	2.64902	426.02	9.6307
5.7	n5068_13Gs12@04	sp, hoz, CLd, r	1.87	2348.03	113.372	163.681	0.0482841	15.3345	0.696927	0.0550685	1.44033		407.247	2.75101	415.003	16.0938
not used in age calculation
5.12	n5068_13Gs12@13*	sp, oz, CLb, r	0.28	512.353	142.664	39.9174	0.278449	14.333	0.666423	0.0543806	0.702725	2.89961	434.765	2.80244	386.846	7.89084
6.16	n5289_Gs12@21§	ap, hoz, CLd, c	0.44	6002.25	126.34	441.162	0.0210488	14.4397	1.26821	0.0549732	2.27272		431.655	5.29723	411.132	25.4118
5.14	n5053_Gs12@1*	sp, hoz, CLb, r	0.19	519.816	207.673	41.2159	0.399514	14.73	0.819568	0.0539296	0.956356	1.44614	423.424	3.3596	368.112	10.7743
6.3	n5289_Gs12@8*	ap, oz, CLd, r	{0.01}	1488.91	586.677	118.856	0.394031	14.7429	0.806828	0.0546359	0.41265	0.83707	423.064	3.30465	397.355	4.62507
5.10	n5068_13Gs12@08*	sp, hoz, CLd, r	0.7	1406.73	10.4815	101	0.00745095	14.7687	0.702118	0.0535555	0.886619	6.83247	422.35	2.87098	352.405	10.0164
6.15	n5289_Gs12@16*	sp, oz, CLb, c	{0.18}	1458.46	237.42	107.21	0.162788	15.0436	0.835309	0.0561349	0.341034	-5.30333	414.874	3.35719	457.706	3.78242
6.2	n5289_Gs12@9†	bp, oz, CLb, c	0.4	297.944	41.1755	20.7017	0.138199	15.7326	1.24737	0.0551533	1.36866		397.253	4.80741	418.442	15.2838
5.6	n5053_Gs12@5†	bp, oz, CLd, r	0.55	2755.67	145.697	186.527	0.0528719	15.7918	0.786765	0.0543362	1.97818		395.809	3.02112	385.008	22.22
5.1	n5068_13Gs12@10*	sp, oz, CLd, r	0.31	3518.3	115.894	232.856	0.0329403	16.0278	1.24212	0.0538311	0.411084	0.837026	390.154	4.70416	363.99	4.63464
6.14	n5289_Gs12@14†	bp, oz, CLb, c	0.14	154.946	23.8913	10.6235	0.154191	16.1161	1.66121	0.0553809	1.12676		388.078	6.2596	427.633	12.5623
Megacrystic granite (13Gs03)
inherited
6.18	n5288_Gs03@30	sp, oz, CLb, rc	{0.01}	434.617	226.752	47.1163	0.521728	11.2327	1.55955	0.0579605	0.531454		549.775	8.22383	528.268	5.82339
6.18	n5288_Gs03@17	sp, oz, CLb, rc	{0.00}	291.656	125.227	30.9087	0.429366	11.2346	0.935141	0.0579155	0.789371		549.683	4.92914	526.565	8.652
6.11	n5288_Gs03@32	sp, sr, oz, CLb, rc	{0.01}	570.984	82.9775	45.949	0.145324	13.7756	0.838104	0.0560526	0.525695		451.753	3.65758	454.453	5.83378
5.6	n5046_Gs03@3	sp, oz, CLd, ec	1.74	4834.2	67.3464	358.334	0.0139312	14.285	0.951374	0.0550435	1.84519		436.175	4.01364	413.991	20.6212
5.6	n5046_Gs03@4	sp, oz, CLd, ec	0.49	3644.35	470.409	277.466	0.129079	14.3103	0.858519	0.0550621	0.543587		435.43	3.61581	414.746	6.07413
6.25	n5288_Gs03@8	sp, sr, oz, CLd, r	0.21	2677.36	615.198	209.502	0.229778	14.3878	0.811972	0.0550855	0.375393		433.163	3.4025	415.696	4.19401
6.2	n5288_Gs03@2	ap, sr, oz, CLd, c	0.19	1798.02	33.9581	132.096	0.0188864	14.4764	0.919595	0.0554423	0.654181		430.598	3.83155	430.103	7.29037
5.2	n5046_Gs03@2	sp, oz, r	{0.01}	1239.98	435.294	97.8519	0.351049	14.4954	0.796591	0.0553651	0.531112		430.053	3.31485	426.996	5.92206
5.1	n5066_13Gs03@04	bp, hoz, CLd, r	0.35	2597.6	177.298	194.965	0.0682542	14.6462	0.672056	0.054867	0.392642		425.768	2.76955	406.807	4.39353
6.7	n5288_Gs03@27	sp, oz, CLb, rc	0.08	684.554	140.703	51.8909	0.205539	14.6708	0.94076	0.0548074	0.748023		425.077	3.87112	404.376	8.3737
6.5	n5288_Gs03@6	sp, oz, CLb, rc	{0.02}	276.281	72.9482	20.9893	0.264036	14.8799	0.829932	0.0543639	0.991719		419.293	3.36998	386.154	11.1373
6.17	n5288_Gs03@20	sp, oz, CLd, rc	{0.01}	1129.63	246.606	85.2147	0.218307	14.8809	0.773973	0.0550457	0.471399		419.266	3.14249	414.08	5.2681
5.5	n5066_13Gs03@08	sp, oz, CLd, r	0.28	1364.65	107.17	98.4646	0.0785329	14.9166	0.735007	0.0547702	0.95777		418.294	2.97755	402.855	10.7246
6.20	n5288_Gs03@13	sp, oz, CLb, c	0.22	694.409	199.198	53.0676	0.28686	14.9876	0.936457	0.0556689	1.44637		416.377	3.77704	439.187	16.0933
6.16	n5288_Gs03@23	sp, oz, CLb, r	{0.03}	450.621	106.355	33.8973	0.236018	15.0132	0.856328	0.0550838	0.743432		415.689	3.44824	415.626	8.30595
6.4	n5288_Gs03@4	sp, oz, CLb, r	{0.02}	298.344	49.8454	21.8967	0.167074	15.0381	0.806632	0.0548822	0.945797		415.023	3.24303	407.426	10.582
6.1	n5288_Gs03@3	ap, oz, CLb, r	0.07	531.147	326.036	43.7071	0.613835	15.0395	0.920148	0.0550912	0.779502		414.984	3.69922	415.926	8.70849
5.7	n5046_Gs03@6	sp, oz, CLb, r	0.11	572.417	356.259	46.6385	0.622376	15.0547	0.924477	0.0547417	0.766741		414.578	3.7131	401.689	8.58728
6.22	n5288_Gs03@29	sp, hoz, CLd, r	{0.01}	1135.29	597.785	91.953	0.52655	15.0677	0.784236	0.0548133	0.403325		414.232	3.14715	404.615	4.51481
6.19	n5288_Gs03@15	sp, oz, CLb, r	{0.03}	224.332	191.672	19.5252	0.854415	15.1334	0.84764	0.0549282	1.07548		412.491	3.38781	409.3	12.0291
6.22	n5288_Gs03@12	sp, hoz, CLd, r	{0.00}	1129.39	590.827	90.6445	0.523139	15.1496	0.788255	0.0548794	0.485735		412.063	3.14724	407.314	5.43474
5.12	n5066_13Gs03@18	sp, hoz, CLb, r	0.12	520.977	75.5801	37.4931	0.145074	15.187	0.67119	0.0547956	0.717919		411.08	2.67355	403.893	8.03738
6.16	n5288_Gs03@22	sp, oz, CLb, r	{0.03}	599.653	26.5416	42.1666	0.0442617	15.2294	0.769415	0.0550735	0.652522		409.971	3.05689	415.208	7.2908
6.23	n5288_Gs03@11	sp, hoz, CLb, c	{0.01}	348.287	227.532	28.8724	0.65329	15.2323	0.866445	0.0556832	0.951583		409.895	3.44187	439.757	10.5869
6.26	n5288_Gs03@19	sp, oz, CLb, r	{0.05}	358.235	97.1563	26.799	0.271208	15.249	0.813264	0.0553523	0.857969		409.46	3.22725	426.483	9.56748
magmatic
6.24	n5288_Gs03@9	sp, oz, CLb, r	0.22	296.479	228.093	24.9461	0.76934	15.3874	0.863657	0.0537444	1.2694		405.892	3.39833	360.354	14.3206
6.13	n5288_Gs03@31	sp, oz, CLb, r	{0.03}	473.582	123.142	35.0386	0.260022	15.4	0.821213	0.0554668	0.712895		405.569	3.22879	431.086	7.94334
6.8	n5288_Gs03@33	sp, oz, r	{0.01}	625.821	122.279	45.4247	0.19539	15.4103	0.776717	0.0550724	0.582555		405.306	3.05188	415.162	6.50909
6.6	n5288_Gs03@7	ap, oz, CLb, r	0.55	279.693	67.6674	20.5172	0.241934	15.4157	0.816513	0.0552442	1.62589		405.169	3.20723	422.121	18.1446
6.9	n5288_Gs03@34	ap, oz, CLb, r	{0.02}	266.752	247.825	23.1592	0.929046	15.4843	0.80776	0.054413	0.817799		403.428	3.15963	388.182	9.18083
6.23	n5288_Gs03@10	sp, hoz, CLb, r	{0.06}	265.601	128.585	20.7041	0.484131	15.5141	0.85162	0.0558026	0.999927		402.678	3.32523	444.523	11.1156
not used in age calculation
6.18	n5288_Gs03@16*	sp, oz, CLb, ec	{0.01}	762.562	173.69	79.7721	0.227772	10.7299	1.10186	0.0574128	0.475367	7.9516	574.421	6.05835	507.425	10.4548
5.8	n5046_Gs03@5*	ap, oz, CLd, r	0.26	2018.53	1032.1	176.579	0.511313	13.2319	0.830643	0.0545153	1.60658	(-19.7)¶	469.657	3.76355	392.399	18.0226
5.3	n5066_13Gs03@07*	sp, hoz, CLb, r	0.03	1221.4	92.0475	92.5769	0.0753623	14.1618	0.668525	0.0550768	0.369181	1.08478	439.844	2.84302	415.342	4.12486
5.4	n5066_13Gs03@06*	sp, cz, CLd, r	0.31	2310.54	70.2182	172.152	0.0303904	14.2775	0.69075	0.0548918	0.437079	1.26946	436.398	2.91531	407.817	4.88991
5.9	n5066_13Gs03@1*	sp, hoz, CLd, rc	0.28	2621.54	70.2055	193.406	0.0267802	14.3871	0.715008	0.0544294	0.350471	6.66507	433.182	2.99621	388.86	3.93401
5.14	n5066_13Gs03@13*	ap, oz, CLd, r	1.14	2492.93	170.973	185.401	0.068583	14.452	0.68138	0.0547365	0.486457	0.982562	431.301	2.84327	401.475	5.44838
5.4	n5066_13Gs03@05*	sp, cz, CLd, r	0.01	1963.36	24.1755	142.634	0.0123133	14.5681	0.988655	0.0546741	0.32241	2.68457	427.977	4.09512	398.92	3.61264
5.3	n5046_Gs03@1*	sp, hoz, CLb, r	0.53	600.737	152.816	46.0662	0.254381	14.6999	0.814974	0.0535408	1.09688	4.35678	424.261	3.34717	351.784	12.3932
5.11	n5066_13Gs03@11‡	ap, oz, CLb, r	3.06	774.605	274.59	59.3908	0.354491	14.9699	0.666389	0.0548828	3.11897		416.853	2.69052	407.452	34.8963
6.22	n5288_Gs03@28*	sp, hoz, CLd, c	{0.00}	1037.19	603.212	85.4209	0.581586	15.0322	0.809406	0.0543244	0.472191	1.41667	415.178	3.25537	384.522	5.30436
6.14	n5288_Gs03@21†	ap, oz, CLb, c	{0.00}	193.578	60.9503	14.6646	0.314862	15.2678	1.67602	0.0561202	1.24403		408.972	6.64496	457.127	13.799
6.15	n5288_Gs03@24*	ap, oz, CLb, c	{0.00}	640.699	351.924	51.4735	0.549282	15.2811	0.793698	0.0558393	0.627291	-0.833948	408.627	3.14338	445.986	6.97144
6.21	n5288_Gs03@14†	sp, oz, CLb, c	{0.05}	390.248	106.464	29.0856	0.272812	15.3312	0.797412	0.0559168	0.836748		407.332	3.14839	449.065	9.29429
6.26	n5288_Gs03@18†	sp, oz, CLb, c	{0.01}	231.953	38.3714	16.7078	0.165427	15.3541	1.17266	0.0562654	1.09951		406.743	4.624	462.855	12.1839
	Data sorted in order of decreasing 206Pb/238U age.
	"Description" refers to particular morphological characteristics of the grain ((i)-(iii)) and the analysed spot of the zircon ((iv)-(v)), respectively:
		(i) ap = acicular prismatic; sp = stubby prismatic; bp = broken prism;
		(ii) r = rounded; sr = sub-rounded; not specified = euhedral grain without obvious rounding;
		(iii) oz = oscillatory zoning; hoz = hint of oscillatory zoning; sz = sector zoning; cz = complex zoning
		(iv) CLb = CL-bright; CLd = CL-dark; not specified = no obvious supremacy of CLb or CLd;
		(v) c = measurement in the centre of the grain; r = measurement at the rim of the grain; ec = embayed core; rc = resorbed core.
	"f206%" represents the percentage of common 206Pb estimated from the measured 204Pb. Values with f206% given in parenthesis represent data which have not been corrected for common 206Pb , due to insignificant levels of 204Pb; values in italics represent data which have been corrected for common 206Pb.
	"% disc." = age discordance at closest approach of 2σ-error ellipse to concordia; positive values are reverse discordant; ¶ = age discordance calculated from the difference between the 206Pb/238U and 206Pb/207Pb ages.
	Data for inherited zircons are in blue, green , red and dark grey; data not used in age calculation are in light grey (see text). Data were not used in age calculation due to *discordance; † lead loss; ‡ significant amount of common lead; § U > 6,000 ppm.
